# Supplementary material
Source: Research Square preprint supplement (doi:10.21203/rs.3.rs-8856126/v1)
Supplement: Supplementary file 1 [file 07a0c75d75f96dad4865bbea.docx]

| Baseline Characteristics | | | | | |
| --- | --- | --- | --- | --- | --- |
| Characteristic Name | Tube Group **n= 12,849** | Trab Group **n= 9,006** | Trab Group P-value | Scleral Buckle Group **n= 3,097** | Scleral Buckle p-value |
| Age at Index, age (SD) | 62.8 (18.8) | 67.9 (14.1) | <0.0001 | 45.1 (18.7) | <0.0001 |
| Gender |  |  |  |  |  |
| Male, n (%) | 6,673 (51.9%) | 4,281 (47.5%) | <0.0001 | 1,800 (58.1%) | <0.0001 |
| Female, n (%) | 6,167 (48.0%) | 4,722 (52.4%) | <0.0001 | 1,297 (41.9%) | <0.0001 |
| Ethnicity |  |  |  |  |  |
| Not Hispanic or Latino, n (%) | 9,516 (74.1%) | 6,960 (77.3%) | <0.0001 | 2,360 (76.2%) | 0.368 |
| Hispanic or Latino, n (%) | 1,718 (13.4%) | 577 (6.4%) | <0.0001 | |  | | --- |  | 404 (13.05%) | | --- | | 0.4353 |
| Unknown Ethnicity, n (%) | 1,615 (12.6%) | 1,469 (16.3%) | <0.0001 | 333 (10.75%) | 0.3342 |
| Race |  |  |  |  |  |
| White, n (%) | 6,969 (54.2%) | 5,208 (57.8%) | <0.0001 | 2,185 (70.6%) | <0.3698 |
| Black or African American, n (%) | 3,115 (24.2%) | 2,328 (25.8%) | 0.0069 | 332 (10.72%) | <0.0001 |
| Asian, n (%) | 494 (3.8%) | 372 (4.1%) | 0.2862 | 127 (4.10%) | 0.719 |
| American Indian or Alaska Native, n (%) | 68 (0.5%) | 32 (0.4%) | 0.0608 | |  | | --- |  | 16 (0.52%) | | --- | | 0.984 |
| Native Hawaiian or Other Pacific Islander, n (%) | 34 (0.3%) | 11 (0.1%) | 0.0222 | 10 (0.32%) | 0.6656 |
| Unknown Race, n (%) | 1,610 (12.5%) | 799 (8.9%) | <0.0001 | |  | | --- |  | 297 (9.59%) | | --- | | <0.0001 |
| Other Race, n (%) | 559 (4.4%) | 256 (2.8%) | <0.0001 | | 134 (4.33% | | --- |  |  | | --- | | 0.4814 |
